# Supplementary material
Source: PubMed Central journal article supplement (PMC2728990)
Supplement: 0907336106_0907336106SI.pdf [file 0907336106_0907336106SI.pdf]

# Supporting Information

Kenny et al. 10.1073/pnas.0907336106

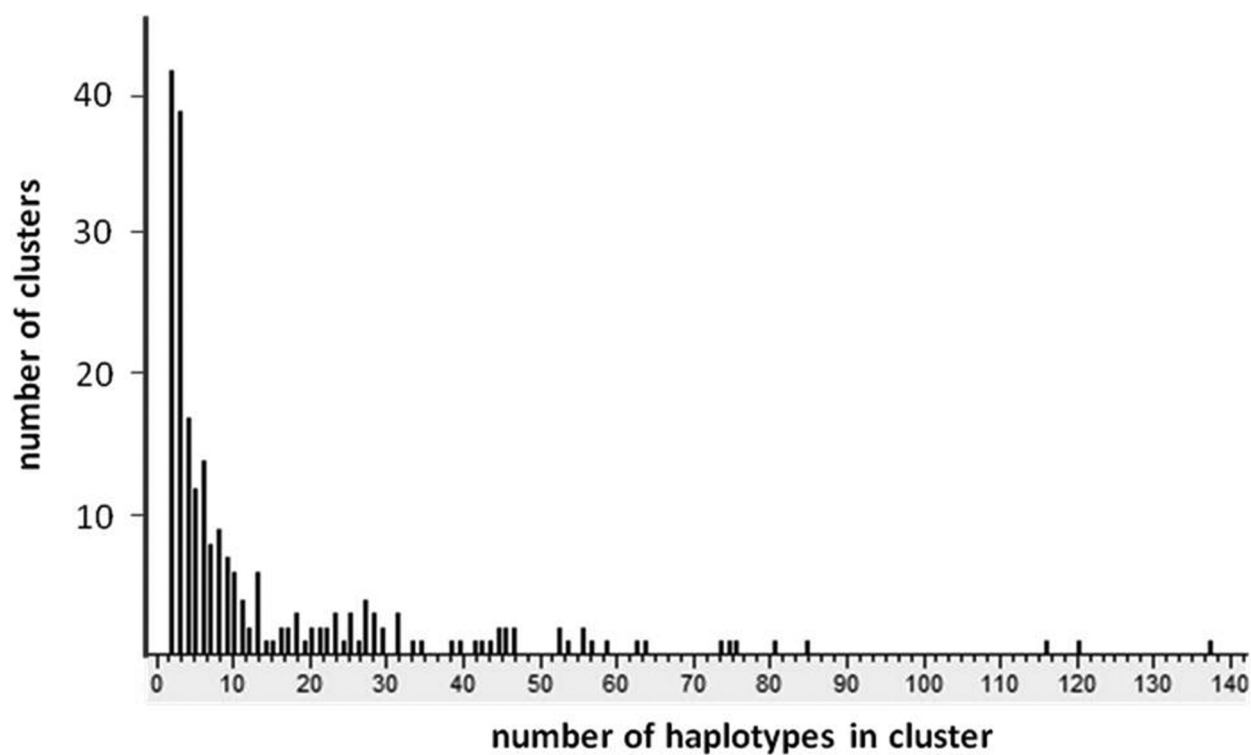

Fig. S1. Histogram of haplotype cluster sizes. The x-axis shows the haplotypes binned by the number of haplotypes in each cluster and the number of clusters for each bin is shown on the y-axis.





**Table S1. Linkage equilibrium between the ABCG8 nonsense mutation and rs12185607/G allele**

|                         |    | rs12185607 |    |
|-------------------------|----|------------|----|
|                         |    | GG         | GT |
| ABCG8 nonsense mutation | GG | 2512       | 64 |
|                         | GC | 321        | 2  |
|                         | CC | 5          | 0  |
|                         |    |            |    |

**Table S2. Lathosterol:cholesterol and other plasma lipid levels. ANOVA analysis of lathosterol:cholesterol and plasma lipid levels comparing carriers of the ABCG8 mutation and 526-kb haplotype and individuals who are wild type for both mutations**

|              | Total<br>Population    | Noncarriers            | ABCG8<br>mutation<br>carriers | PPS haplotype<br>carriers | Non-<br>carriers<br>vs. ABCG8<br>mutation<br>carriers | Non-<br>carriers<br>vs. PPS<br>haplotype<br>carriers | Non-<br>carriers<br>vs ABCG8<br>carriers vs.<br>PPS carriers |
|--------------|------------------------|------------------------|-------------------------------|---------------------------|-------------------------------------------------------|------------------------------------------------------|--------------------------------------------------------------|
| Lath:Chol    | 1.50 ± 0.66 (1,900)    | 1.52 ± 0.67 (1,687)    | 1.33 ± 0.55 (213)             | 0.84 ± 0.38 (44)          | 1.08 × 10 <sup>-4</sup>                               | 3.68 × 10 <sup>-11</sup>                             | <0.0001                                                      |
| TC, mg/dL    | 166.09 ± 34.43 (2,819) | 165.48 ± 34.35 (2,452) | 170.2 ± 34.48 (315)           | 167.55 ± 34.92 (52)       | 0.022                                                 | N.S.                                                 | N.S                                                          |
| LDL-c, mg/dL | 102.1 ± 29.54 (1,899)  | 101.63 ± 29.3 (1,645)  | 105.42 ± 30.63 (210)          | 100.84 ± 30.73 (44)       | N.S.                                                  | N.S.                                                 | N.S                                                          |
| ApoB, mg/dL  | 86.97 ± 21.32 (1,884)  | 86.65 ± 21.31 (1,621)  | 88.53 ± 21.64 (219)           | 89.7 ± 19.8 (35)          | N.S.                                                  | N.S.                                                 | N.S                                                          |
| HDL-c, mg/dL | 38.28 ± 11.04 (1,899)  | 38.09 ± 10.95 (1,645)  | 38.77 ± 11.36 (210)           | 42.00 ± 9.93 (44)         | N.S.                                                  | N.S.                                                 | N.S                                                          |
| ApoA1, mg/dL | 116.87 ± 24.39 (1,875) | 116.64 ± 24.07 (1,621) | 118.07 ± 26.5 (219)           | 122.21 ± 25.3 (35)        | N.S.                                                  | N.S.                                                 | N.S                                                          |
| TG, mg/dL    | 99.94 ± 46.16 (2,817)  | 100.94 ± 45.91 (2,450) | 95.58 ± 39.02 (315)           | 93.26 ± 36.32 (52)        | 0.05                                                  | N.S.                                                 | N.S                                                          |

*N*, number of individuals; Lath:Chol, lathosterol/cholesterol ratio; TC, total cholesterol; LDL-c, low density lipoprotein cholesterol; HDL-c, high density lipoprotein cholesterol; TG, triglycerides. All numbers are averages ± standard deviation and the sample size is shown in parentheses.
